# Supplementary material
Source: PubMed Central journal article supplement (PMC6143108)
Supplement: jama-320-1005-s001.pdf [file jama-320-1005-s001.pdf]

## Supplementary Online Content

Lowe WL, Scholtens DM, Lowe LP, et al; for the Collaborator Members of the HAPO Follow-up Study Cooperative Research Group. Association of gestational diabetes with maternal disorders of glucose metabolism and childhood adiposity. *JAMA*. doi:10.1001/jama.2018.11628

**eFigure 1.** Flowchart describing the HAPO follow-up study visit for children including urine sample, physical measurements and 2-hr OGTT

**eFigure 2.** Flowchart describing the HAPO follow-up study visit for mothers including urine sample, physical measurements, questionnaire and 2-hr OGTT

**eFigure 3.** Flowchart describing enrollment for children participating in the HAPO follow-up study (FUS)

**eFigure 4.** Flowchart describing enrollment for mothers participating in the HAPO follow-up study (FUS)

### **eMethods**

**eTable 1.** Numbers of HAPO FUS participants at each field center

**eTable 2.** Race/ethnicity by field center for participating children

**eTable 3.** Race/ethnicity by field center for participating mothers

**eTable 4.** Characteristics of mothers of HAPO FUS child participants during HAPO pregnancy OGTT

This supplementary material has been provided by the authors to give readers additional information about their work.

**eFigure 1.** Flowchart describing the HAPO follow-up study visit for children including urine sample, physical measurements and 2-hr OGTT

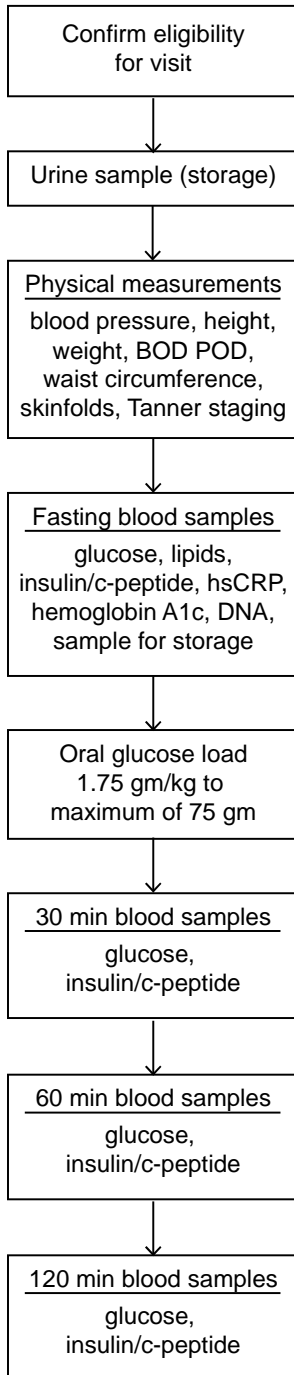

**eFigure 2.** Flowchart describing the HAPO follow-up study visit for mothers including urine sample, physical measurements, questionnaire and 2-hr OGTT

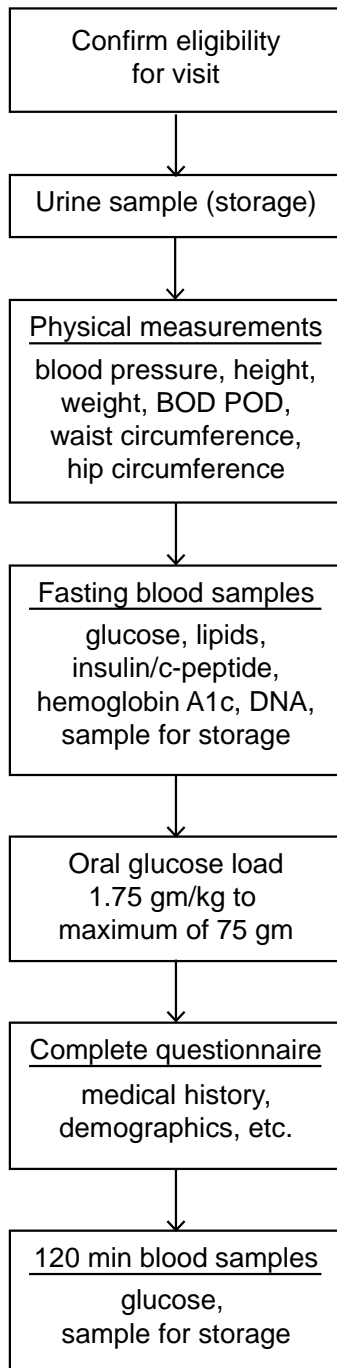

**eFigure 3.** Flowchart describing enrollment for children participating in the HAPO follow-up study (FUS)

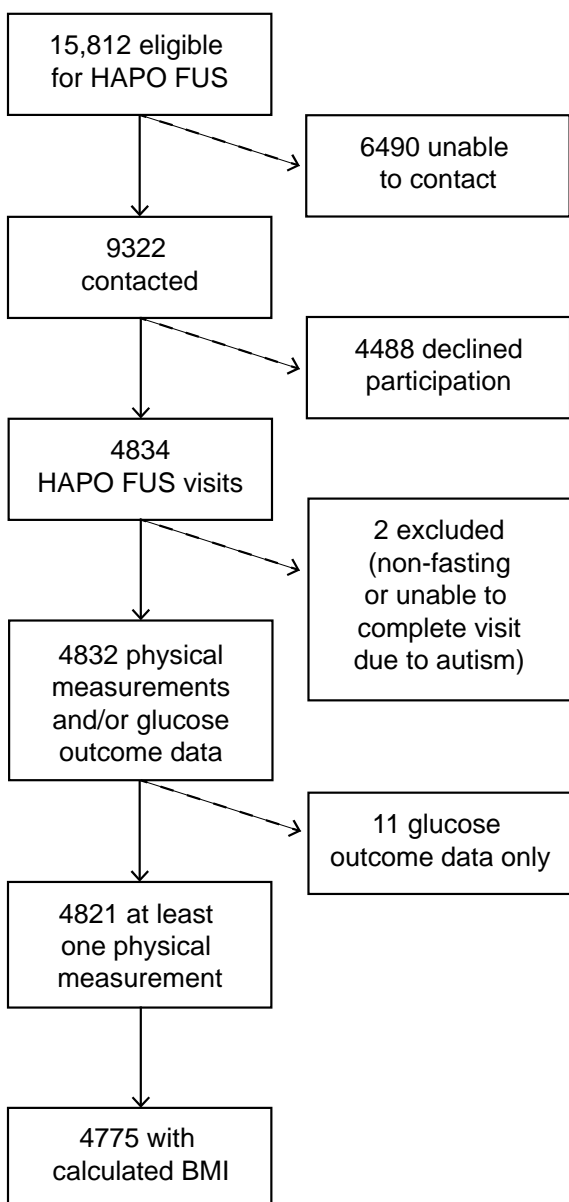

Multiple attempts were made to contact all 15,812 eligible mother/child pairs. Of these 9322 were contacted and 4834 children completed at least one component of the HAPO Follow-Up Study visit. Data were excluded from 2 children (1 due to non-fasting status and 1 due to inability to complete the study visit due to autism) leaving 4832 children with physical measurements and/or glucose outcome data. Of these, 4821 had at least one physical measurement and were analyzed for the primary anthropometric outcomes. Of the 4821, 4775 had data available for calculating BMI.

**eFigure 4.** Flowchart describing enrollment for mothers participating in the HAPO follow-up study (FUS)

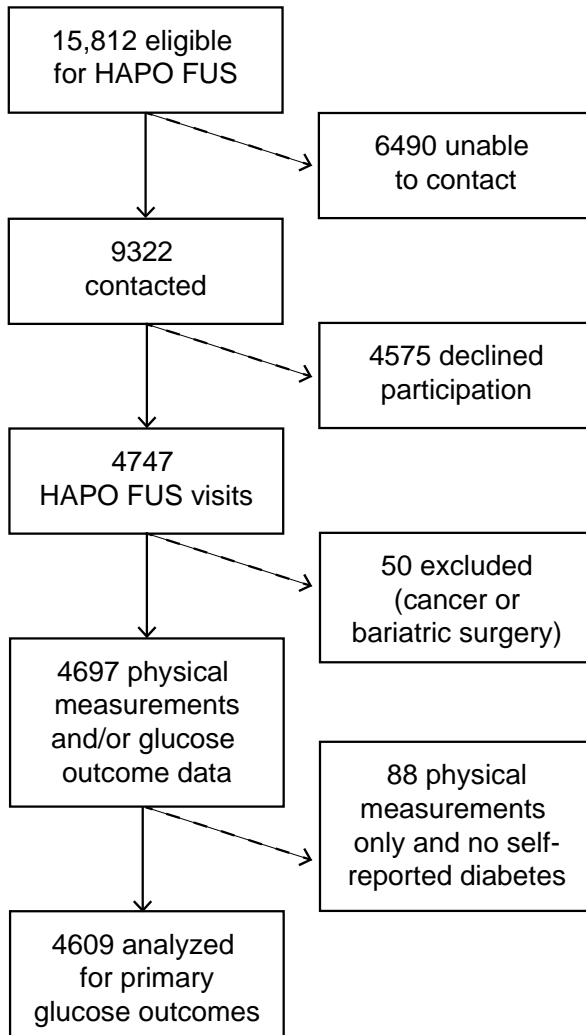

Multiple attempts were made to contact all 15,812 eligible mother/child pairs. Of these 9322 were contacted and 4747 mothers completed at least one component of the HAPO Follow-Up Study visit. Data were excluded from 50 mothers (49 due to prior bariatric surgery, 1 due to ongoing cancer treatment) leaving 4697 mothers for analyses. Of these, 4609 mothers had glucose measurements or self-reported T2DM on treatment and were analyzed for primary glucose outcomes in mothers.

## eMethods

### ***Multiple Imputation for Missing Tanner Stage***

The HAPO Follow-Up Study visit protocol specified evaluation of Tanner Stage 1, 2/3 or 4/5 by trained medical study staff according to breast/areolar development or by asking about menstruation for girls and measurement of testicular volume using a Prader orchidometer for boys. For girls, 2008 trained assessments were completed and 381 (19.0%), 852 (42.5%) and 774 (38.5%) were Stage 1, 2/3 and 4/5, respectively. For boys, 1570 trained assessments were completed and 565 (36.0%), 726 (46.2%) and 279 (17.8%) were Stage 1, 2/3 and 4/5, respectively. Due to refusal of either the HAPO child or the HAPO child's mother, trained assessments were not collected for 359/2367 (15.2%) of girls and 895/2465 (36.3%) of boys. For all HAPO FUS child participants for whom a back-up blood sample was available, serum hormone-binding globulin (SHBG) was measured using an immunofluorometric assay. In addition, testosterone was measured for boys and estradiol was measured for girls.

Testosterone and estradiol levels were measured by the Brigham Research Assay Core Laboratory using liquid chromatography (LC) tandem mass spectrometry (MS) at the Brigham and Women's Hospital [1-2]. The testosterone LC-MS/MS assay has a sensitivity of 0.5 ng/mL and estradiol LC-MS/MS assay 1 pg/mL. SHBG and testosterone were successfully measured in 2199 (89.2%) and 2230 (90.5%) of 2465 boys, respectively. SHBG and estradiol were successfully measured in 2090 (88.3%) and 2131 (90.0%) of 2367 girls, respectively.

Statistical models including adjustment for trained assessment of Tanner stage were performed using multiple imputation. All variables to be used for statistical analyses as well as sex steroid measurements were identified, and then 25 rounds of multiple imputation were performed to impute all missing observations across all variables. Imputations were performed separately for

boys and girls. Missing data assumptions 'missing at random' and 'missing not at random' were both explored. Estimated associations varied little for these assumptions, hence results were reported under the simpler 'missing at random' assumption.

[1] Jasuja GK, Trivison TG, Davda M, Murabito JM, Basaria S, Zhang A, Kushnir MM, Rockwood AL, Meikle W, Pencina MJ, Coviello A, Rose AJ, D'Agostino R, Ramachandran SV, Bhasin S. (2013) Age trends in estradiol and estrone levels measured using liquid chromatography tandem mass spectrometry in community-dwelling men of the Framingham Heart Study. *The Journals of Gerontology: Series A*. 68(6): 733-740.

[2] Bhasin S, Pencina M, Jasuja GK, Trivison TG, Coviello A, Orwoll E, Wang PY, Nielson C, Wu F, Tajar A, Labrie F, Vesper H, Zhang A, Ulloor J, Singh R, D'Agostino R, Vasani RS. (2011) Reference ranges for testosterone in men generated using liquid chromatography tandem mass spectrometry in a community-based sample of healthy nonobese young men in the Framingham Heart Study and applied to three geographically distinct cohorts. *Journal of Clinical Endocrinology and Metabolism*. 96(8):2430-2439.

**eTable 1.** Numbers of HAPO FUS participants at each field center

| <b>Field Center</b>   | <b>Total Eligible</b> | <b>Number (%) of Child Participants</b> | <b>Number (%) of Mother Participants</b> |
|-----------------------|-----------------------|-----------------------------------------|------------------------------------------|
| Bangkok, Thailand     | 2179                  | 247 (11.3)                              | 247 (11.3)                               |
| Barbados, West Indies | 1827                  | 618 (33.8)                              | 584 (32.0)                               |
| Belfast, UK           | 1548                  | 704 (45.5)                              | 701 (45.3)                               |
| Bellflower, CA, USA   | 1774                  | 535 (30.1)                              | 514 (29.0)                               |
| Chicago, IL, USA      | 688                   | 296 (43.0)                              | 293 (42.6)                               |
| Cleveland, OH, USA    | 697                   | 259 (37.2)                              | 249 (35.7)                               |
| Hong Kong, China      | 1523                  | 736 (48.3)                              | 734 (48.2)                               |
| Manchester, UK        | 2086                  | 522 (25.0)                              | 520 (24.9)                               |
| Petah-Tiqva, Israel   | 1638                  | 515 (31.4)                              | 460 (28.1)                               |
| Toronto, Canada       | 1852                  | 400 (21.6)                              | 395 (21.3)                               |
| <b>Total</b>          | <b>15,812</b>         | <b>4832 (30.6)</b>                      | <b>4697 (29.7)</b>                       |



**eTable 2.** Race/ethnicity by field center for participating children

| Field Center | N   | N (%)              |            |                    |             |          |
|--------------|-----|--------------------|------------|--------------------|-------------|----------|
|              |     | White non-Hispanic | Hispanic   | Black non-Hispanic | Asian       | Other    |
| Bangkok      | 247 | 0                  | 0          | 0                  | 247 (100.0) | 0        |
| Barbados     | 618 | 0                  | 0          | 618 (100.0)        | 0           | 0        |
| Belfast      | 704 | 700 (99.4)         | 0          | 0                  | 0           | 4 (0.6)  |
| Bellflower   | 535 | 30 (5.6)           | 444 (83.0) | 46 (8.6)           | 12 (2.3)    | 3 (0.6)  |
| Chicago      | 296 | 240 (81.1)         | 29 (9.8)   | 10 (3.4)           | 15 (5.1)    | 2 (0.7)  |
| Cleveland    | 259 | 164 (63.3)         | 34 (13.1)  | 58 (22.4)          | 1 (0.4)     | 2 (0.8)  |
| Hong Kong    | 736 | 0                  | 0          | 0                  | 709 (96.3)  | 27 (3.7) |
| Manchester   | 522 | 296 (56.7)         | 0          | 33 (6.3)           | 154 (29.5)  | 39 (7.5) |
| Petah-Tiqva  | 515 | 515 (100.0)        | 0          | 0                  | 0           | 0        |
| Toronto      | 400 | 342 (85.5)         | 0          | 10 (2.5)           | 38 (9.5)    | 10 (2.5) |

**eTable 3.** Race/ethnicity by field center for participating mothers

| Field Center | N   | N (%)              |            |                    |             |          |
|--------------|-----|--------------------|------------|--------------------|-------------|----------|
|              |     | White non-Hispanic | Hispanic   | Black non-Hispanic | Asian       | Other    |
| Bangkok      | 247 | 0                  | 0          | 0                  | 247 (100.0) | 0        |
| Barbados     | 584 | 0                  | 0          | 584 (100.0)        | 0           | 0        |
| Belfast      | 701 | 697 (99.4)         | 0          | 0                  | 0           | 4 (0.6)  |
| Bellflower   | 514 | 29 (5.6)           | 427 (83.1) | 43 (8.4)           | 12 (2.3)    | 3 (0.6)  |
| Chicago      | 293 | 237 (80.9)         | 29 (9.9)   | 10 (3.4)           | 15 (5.1)    | 2 (0.7)  |
| Cleveland    | 249 | 159 (63.9)         | 32 (12.9)  | 55 (22.1)          | 1 (0.4)     | 2 (0.8)  |
| Hong Kong    | 734 | 0                  | 0          | 0                  | 707 (96.3)  | 27 (3.7) |
| Manchester   | 520 | 294 (56.5)         | 0          | 33 (6.3)           | 154 (29.6)  | 39 (7.5) |
| Petah-Tiqva  | 460 | 460 (100.0)        | 0          | 0                  | 0           | 0        |
| Toronto      | 395 | 337 (85.3)         | 0          | 10 (2.5)           | 38 (9.6)    | 10 (2.5) |

**eTable 4.** Characteristics of mothers of HAPO FUS child participants during HAPO pregnancy OGTT

| <b>Characteristics – Mothers of HAPO FUS Children During HAPO Pregnancy</b> | <b>Gestational Diabetes Mellitus*</b> | <b>No Gestational Diabetes Mellitus</b> | <b>Overall</b>   | <b>Child Non-Participants**</b> |
|-----------------------------------------------------------------------------|---------------------------------------|-----------------------------------------|------------------|---------------------------------|
|                                                                             | <b>N=683<br/>(14.1%)</b>              | <b>N=4149<br/>(85.9%)</b>               | <b>N=4832</b>    | <b>N=10980<br/>(16.4% GDM)</b>  |
|                                                                             | <b>Mean (SD)</b>                      | <b>Mean (SD)</b>                        | <b>Mean (SD)</b> |                                 |
| Age at OGTT (yrs)                                                           | 31.9 (5.3)                            | 29.6 (5.6)                              | 29.9 (5.7)       | 29.1 (5.3)                      |
| Gestational Age at OGTT (wks)                                               | 27.9 (1.7)                            | 27.6 (1.7)                              | 27.7 (1.7)       | 27.7 (1.5)                      |
| Height (cm)                                                                 | 161.1 (7.0)                           | 161.9 (6.7)                             | 161.8 (6.8)      | 161.5 (6.3)                     |
| Weight (kg)                                                                 | 77.8 (16.0)                           | 71.1 (13.6)                             | 72.0 (14.2)      | 71.9 (13.4)                     |
| Body Mass Index (BMI) (kg/m <sup>2</sup> )                                  | 29.9 (5.5)                            | 27.1 (4.7)                              | 27.5 (4.9)       | 27.5 (4.8)                      |
| Mean Arterial Pressure (mmHg)                                               | 83.5 (7.8)                            | 80.0 (7.9)                              | 80.5 (8.0)       | 80.7 (7.8)                      |
| Fasting Plasma Glucose (mg/dL)                                              | 89.0 (7.6)                            | 79.7 (5.4)                              | 81.0 (6.6)       | 81.2 (6.5)                      |
| 1-hr Plasma Glucose (mg/dL)                                                 | 173.0 (28.8)                          | 126.6 (24.9)                            | 133.1 (30.2)     | 133.0 (29.9)                    |
| 2-hr Plasma Glucose (mg/dL)                                                 | 137.1 (26.7)                          | 106.0 (19.1)                            | 110.4 (23.0)     | 110.6 (22.7)                    |
|                                                                             | <b>N (%)</b>                          | <b>N (%)</b>                            | <b>N (%)</b>     | <b>(%)</b>                      |
| Race/Ethnicity                                                              |                                       |                                         |                  |                                 |
| White, Non-Hispanic                                                         | 277 (40.6)                            | 2010 (48.4)                             | 2287 (47.3)      | (46.8)                          |
| Hispanic                                                                    | 113 (16.5)                            | 394 (9.5)                               | 507 (10.5)       | (9.6)                           |
| Black, Non-Hispanic                                                         | 81 (11.9)                             | 694 (16.7)                              | 775 (16.0)       | (15.5)                          |
| Asian                                                                       | 196 (28.7)                            | 980 (23.6)                              | 1176 (24.3)      | (25.7)                          |
| Other                                                                       | 16 (2.3)                              | 71 (1.7)                                | 87 (1.8)         | (2.5)                           |
| Any Prenatal Alcohol Use                                                    | 43 (6.3)                              | 202 (4.9)                               | 245 (5.1)        | (6.7)                           |
| Any Prenatal Smoking                                                        | 59 (8.6)                              | 347 (8.4)                               | 406 (8.4)        | (8.3)                           |
| Parity (any prior delivery ≥ 20 weeks)                                      | 392 (57.4)                            | 2093 (50.4)                             | 2485 (51.4)      | (49.7)                          |
| Family History of Diabetes                                                  | 207 (30.3)                            | 870 (21.0)                              | 1077 (22.3)      | (21.4)                          |

To convert the values for glucose to mmol/L, multiply by 0.05551.

\*GDM=gestational diabetes mellitus defined by IADPSG criteria (1 or more glucose values from a 75g OGTT equals or exceeds FPG 92 mg/dL, 1-hr 180 mg/dL, 2-hr 153 mg/dL)

\*\*Summary statistics for non-participants are weighted by the number of participants at each field center
